# Supplementary material
Source: PubMed Central journal article supplement (PMC3880131)
Supplement: NIHMS539242-supplement-6.pdf [file NIHMS539242-supplement-6.pdf]

| Chromosome | Median error | Median rank error | Error > 10mb | Rank error > 10 | Correct neighbor ranks | Spearman correlation | Breaks |
|------------|--------------|-------------------|--------------|-----------------|------------------------|----------------------|--------|
| 14         | 9.67E+05     | 6                 | 0.036        | 0.334           | 0.119                  | 0.974                | 1      |
