# Supplementary material
Source: PubMed Central journal article supplement (PMC3880131)

# Supplemental Figure 1

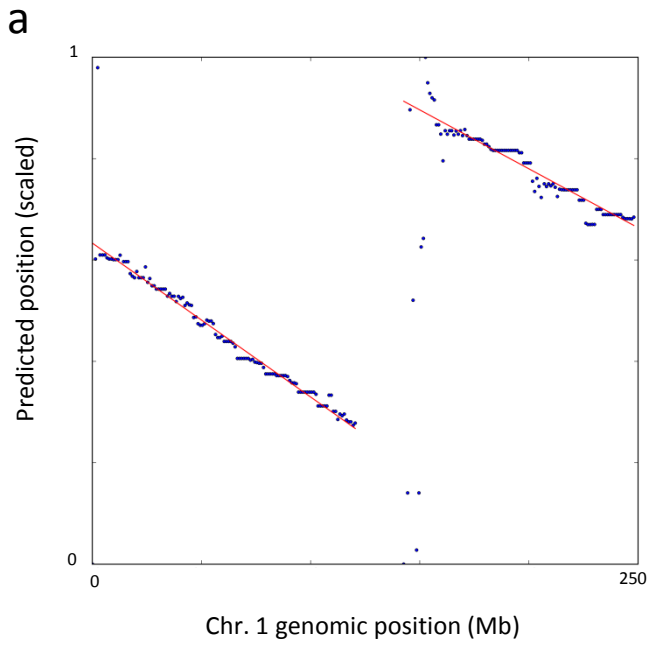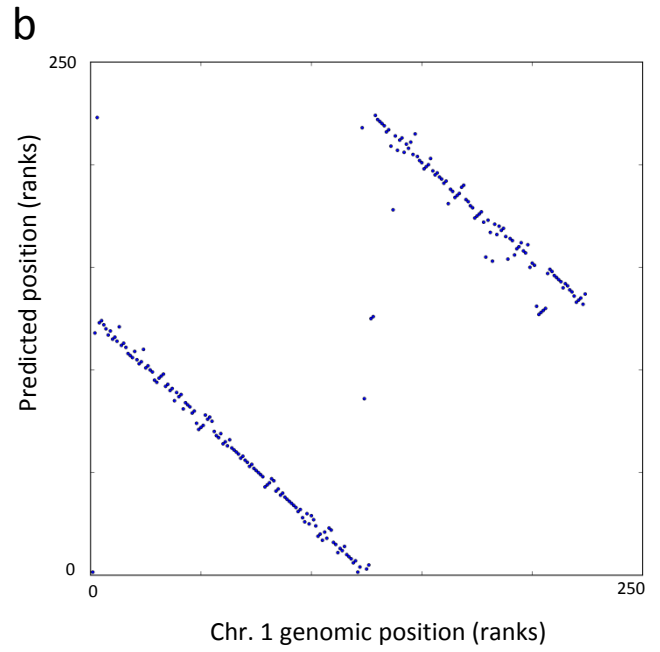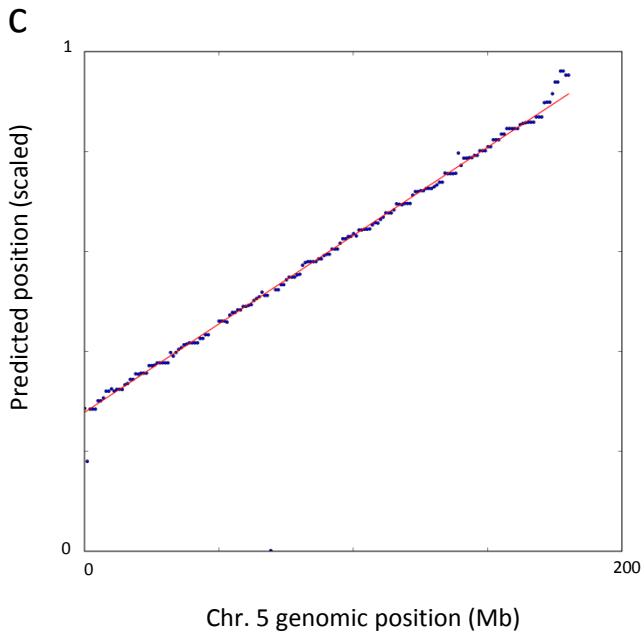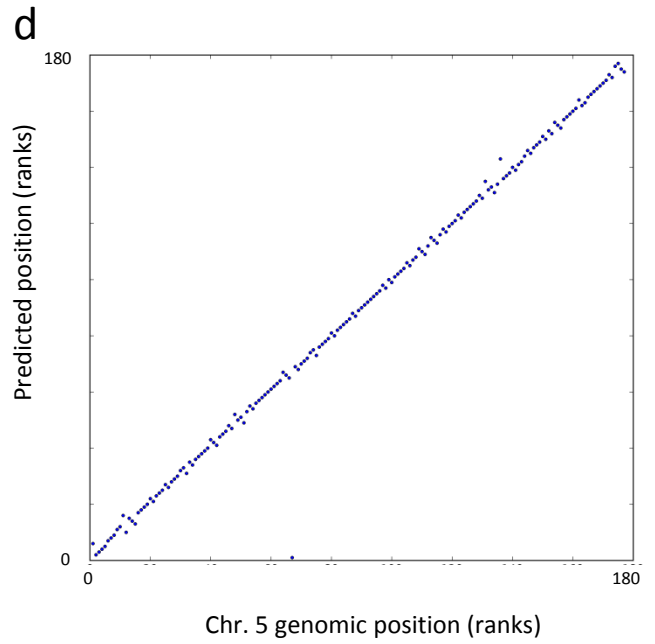

Actual positions

Supplement: NIHMS539242-supplement-3.pdf [file NIHMS539242-supplement-3.pdf]
